# Supplementary material for: Gatekeeper Training and Minimum Standards of Competency: Essentials for the Suicide Prevention Workforce
Source: PubMed Central journal article supplement (PMC9716344; doi:10.1027/0227-5910/a000794), 2021-06-30
Supplement: cri_43_6_516_esm1.pdf [file cri_43_6_516_esm1.pdf]

## Electronic Supplementary Material 1

Table 1. Learning outcome domains for suicide prevention workers

| What the worker is able to 'do': Competence (knowledge, attitudes and skills)                                                                                                                                                                                                                                                                                                                                                    | How the worker approaches their suicide prevention practice                                                                                                                                                                                                                                                                                                             | The worker as a professional                                                                                                                                                                                                                                                                            |
|----------------------------------------------------------------------------------------------------------------------------------------------------------------------------------------------------------------------------------------------------------------------------------------------------------------------------------------------------------------------------------------------------------------------------------|-------------------------------------------------------------------------------------------------------------------------------------------------------------------------------------------------------------------------------------------------------------------------------------------------------------------------------------------------------------------------|---------------------------------------------------------------------------------------------------------------------------------------------------------------------------------------------------------------------------------------------------------------------------------------------------------|
| <ul style="list-style-type: none"><li>• Clinical/applied skills</li><li>• *Practical procedures/approaches and strategies</li><li>• *Engaging and assessment of the client</li><li>• Intervention and management</li><li>• Health promotion and early intervention (including networking)</li><li>• *Communication and referral</li><li>• Handling of information (documentation, reporting) and information retrieval</li></ul> | <ul style="list-style-type: none"><li>• With understanding of evidence-based theory and practice, and principles of suicide prevention domains</li><li>• *With appropriate attitudes, cultural understanding, and ethical and legal responsibilities</li><li>• With appropriate decision making, problem-solving and clinical/applied reasoning and judgement</li></ul> | <ul style="list-style-type: none"><li>• *An understanding of the individual's role in the organisation and within the broader suicide prevention spectrum</li><li>• *An aptitude for personal development, insight and interpersonal communication, and personal and professional development</li></ul> |

\* Represents proposed areas of relevance for 'gatekeepers' undertaking non-clinical training

Table 2. Competencies for suicide prevention workers in prevention, intervention, and postvention

| <i>Prevention</i>                                                                                                                                                                                                                                                                                                                                                                                                                                                                                                                                                                                                                                                                                                                                                                                                                                                                                                                                                                                                                                     | <i>Intervention</i>                                                                                                                                                                                                                                                                                                                                                                                                                                                                                                                                                                                                                                                                                           | <i>Postvention</i>                                                                                                                                                                                                                                                                                        |
|-------------------------------------------------------------------------------------------------------------------------------------------------------------------------------------------------------------------------------------------------------------------------------------------------------------------------------------------------------------------------------------------------------------------------------------------------------------------------------------------------------------------------------------------------------------------------------------------------------------------------------------------------------------------------------------------------------------------------------------------------------------------------------------------------------------------------------------------------------------------------------------------------------------------------------------------------------------------------------------------------------------------------------------------------------|---------------------------------------------------------------------------------------------------------------------------------------------------------------------------------------------------------------------------------------------------------------------------------------------------------------------------------------------------------------------------------------------------------------------------------------------------------------------------------------------------------------------------------------------------------------------------------------------------------------------------------------------------------------------------------------------------------------|-----------------------------------------------------------------------------------------------------------------------------------------------------------------------------------------------------------------------------------------------------------------------------------------------------------|
| <p><i>Research, theory and knowledge:</i></p> <ul style="list-style-type: none"> <li>• *Demonstrate understanding of epidemiological trends, statistics, culture and contexts of suicidal behaviours</li> <li>• *Understand the link between attitudes, stigma, language and knowledge</li> <li>• *Understanding the importance of lived experience in approaching suicide prevention</li> <li>• *Demonstrate knowledge of the multifaceted nature of suicidal behaviour and the differing developmental pathways/trajectories for suicide.</li> <li>• Describe different suicide prevention and response models.</li> <li>• Articulate operational frameworks of practice (individual and organisational)</li> <li>• Identify the differences between targeted and universal suicide prevention strategies.</li> <li>• Define and describe ways to increase effective collaboration and partnerships between community and government services</li> <li>• Identify resources within the community for suicidal persons and their families</li> </ul> | <p><i>Engaging the suicidal person:</i></p> <ul style="list-style-type: none"> <li>• Differentiate between acute, sub-acute and crisis situations.</li> <li>• *Identify differences in engaging responses for different suicidal contexts (above)</li> <li>• *Discuss appropriate language and interpersonal skills for establishing rapport with suicidal persons</li> <li>• Describe the principles for working with suicidal persons</li> <li>• *Understand the unique factors impacting on suicidal persons</li> <li>• Demonstrate appropriate boundaries between the worker and client</li> <li>• *Understand and demonstrate sensitivity towards suicidal persons from different backgrounds</li> </ul> | <p><i>Management and rehabilitation:</i></p> <ul style="list-style-type: none"> <li>• Describe essential resources and procedures for long-term management of a suicidal person</li> <li>• Demonstrate understanding of the difference between management and long-term therapeutic approaches</li> </ul> |
|                                                                                                                                                                                                                                                                                                                                                                                                                                                                                                                                                                                                                                                                                                                                                                                                                                                                                                                                                                                                                                                       | <p><i>Risk assessment and duty of care:</i></p> <ul style="list-style-type: none"> <li>• *Describe and report on the range of risk and protective factors and warning signs for suicide across different developmental age groups</li> </ul>                                                                                                                                                                                                                                                                                                                                                                                                                                                                  | <p><i>Postvention:</i></p> <ul style="list-style-type: none"> <li>• Understand the principles of postvention (including bereavement and prevention of suicide contagion)</li> </ul>                                                                                                                       |

- 
- |                                                                                                                                                                                                                                                                                                                                                                                                                                             |                                                                                                                                                                                                                                                                                                                                                                                                                                                                   |
|---------------------------------------------------------------------------------------------------------------------------------------------------------------------------------------------------------------------------------------------------------------------------------------------------------------------------------------------------------------------------------------------------------------------------------------------|-------------------------------------------------------------------------------------------------------------------------------------------------------------------------------------------------------------------------------------------------------------------------------------------------------------------------------------------------------------------------------------------------------------------------------------------------------------------|
| <ul style="list-style-type: none"><li>• Describe an holistic approach to suicide assessment</li><li>• Apply different assessment methods for identifying risk state</li><li>• *Elicit important information from assessment of risk factors to guide subsequent intervention</li><li>• Define duty of care and workplace obligations.</li><li>• Demonstrate understanding of legal requirements when working with suicidal people</li></ul> | <ul style="list-style-type: none"><li>• Describe the main areas to be considered in the aftermath of a suicide.</li><li>• Describe any differences between postvention plans applied at the individual, family, and community levels.</li><li>• Identify the needs of the individual, family and community in a plan, and include the identification of external support agencies.</li><li>• Describe prevention responses to prevent suicide contagion</li></ul> |
|---------------------------------------------------------------------------------------------------------------------------------------------------------------------------------------------------------------------------------------------------------------------------------------------------------------------------------------------------------------------------------------------------------------------------------------------|-------------------------------------------------------------------------------------------------------------------------------------------------------------------------------------------------------------------------------------------------------------------------------------------------------------------------------------------------------------------------------------------------------------------------------------------------------------------|
- 

*Crisis Intervention:*

- Understand the difference between crisis intervention and long-term therapy
- Describe the principles of crisis intervention
- Assess the appropriate risk state and identify the problem
- \*Describe and match client needs to services identified with the organisation or referring organisation
- Describe intervention strategies different stages of crisis intervention (eg, safety, support, and giving information)
- \*Demonstrate obtaining commitment from a suicidal person and the issues involved in making a contract with a client
- \*Outline appropriate referral processes
- Demonstrate knowledge of a management plan

*Self Care:*

- \*Understand the importance of different areas of personal management and self care
- Describe principles and practice of supervision
- Describe principles and practice of debriefing
- Understand the usefulness of worker supervision and debriefing within the organisation
- \*Describe some of the factors contributing to negative emotions and well-being
- \*Describe the strategies to improve physical and emotional well-being.

\* Represents proposed areas of relevance for ‘gatekeepers’ undertaking non-clinical training
